# Supplementary material for: Comparison of the 18-item and 6-item Lubben Social Network Scales with community-dwelling older adults in Mongolia
Source: PubMed Central journal article supplement (PMC6472776; doi:10.1371/journal.pone.0215523), 2019-04-18
Supplement: pone.0215523.s001.pdf [file pone.0215523.s001.pdf]

Lubben Social Network Scale – 6 item (LSNS-6)  
English Version

**FAMILY:** *Considering the people to whom you are related, either by birth or marriage . . .*

1. How many relatives do you see or hear from at least once a month?

|      |     |     |        |     |           |
|------|-----|-----|--------|-----|-----------|
| None | One | Two | 3 or 4 | 5-8 | 9 or more |
| 0    | 1   | 2   | 3      | 4   | 5         |

2. How many relatives do you feel at ease with that you can talk about private matters?

|      |     |     |        |     |           |
|------|-----|-----|--------|-----|-----------|
| None | One | Two | 3 or 4 | 5-8 | 9 or more |
| 0    | 1   | 2   | 3      | 4   | 5         |

3. How many relatives do you feel close to such that you could call on them for help?

|      |     |     |        |     |           |
|------|-----|-----|--------|-----|-----------|
| None | One | Two | 3 or 4 | 5-8 | 9 or more |
| 0    | 1   | 2   | 3      | 4   | 5         |

**FRIENDSHIPS:** *Considering all of your friends, including those who live in your neighborhood . . .*

4. How many of your friends do you see or hear from at least once a month?

|      |     |     |        |     |           |
|------|-----|-----|--------|-----|-----------|
| None | One | Two | 3 or 4 | 5-8 | 9 or more |
| 0    | 1   | 2   | 3      | 4   | 5         |

5. How many friends do you feel at ease with that you can talk about private matters?

|      |     |     |        |     |           |
|------|-----|-----|--------|-----|-----------|
| None | One | Two | 3 or 4 | 5-8 | 9 or more |
| 0    | 1   | 2   | 3      | 4   | 5         |

6. How many friends do you feel close to such that you could call on them for help?

|      |     |     |        |     |           |
|------|-----|-----|--------|-----|-----------|
| None | One | Two | 3 or 4 | 5-8 | 9 or more |
| 0    | 1   | 2   | 3      | 4   | 5         |
