# Supplementary material for: Comparison of the 18-item and 6-item Lubben Social Network Scales with community-dwelling older adults in Mongolia
Source: PubMed Central journal article supplement (PMC6472776; doi:10.1371/journal.pone.0215523), 2019-04-18
Supplement: pone.0215523.s002.pdf [file pone.0215523.s002.pdf]

**НИЙГМИЙН ХАРИЛЦААНЫ СҮЛЖЭЭГ ҮНЭЛЭХ**  
**ЛЮБИНИЙ АСУУЛГА (LSNS-6M)**

**ГЭР БҮЛ:** Энд таны болон хадмын талын төрөл садан хамаарна.

**1. Танд сардаа уулздаг юм уу эсвэл холбоо барьдаг хэдэн ах дүү, төрөл садангийн хүн байдаг вэ?**

| огт<br>байхгүй | ганц<br>нэгхэн | хоёр | 3 - 4 | 5 - 8 | 9 ба түүнээс<br>дээш |
|----------------|----------------|------|-------|-------|----------------------|
| 0              | 1              | 2    | 3     | 4     | 5                    |

**2. Та ах дүү, төрөл садангийнхаа хэдэн хүнтэй хувийн асуудлаа илэн далангүй ярилцаж чаддаг вэ?**

| огт<br>байхгүй | ганц<br>нэгхэн | хоёр | 3 - 4 | 5 - 8 | 9 ба түүнээс<br>дээш |
|----------------|----------------|------|-------|-------|----------------------|
| 0              | 1              | 2    | 3     | 4     | 5                    |

**3. Тусламж хүсэхэд ирэх ойр дотны хэдэн төрөл садан байна вэ?**

| огт<br>байхгүй | ганц<br>нэгхэн | хоёр | 3 - 4 | 5 - 8 | 9 ба түүнээс<br>дээш |
|----------------|----------------|------|-------|-------|----------------------|
| 0              | 1              | 2    | 3     | 4     | 5                    |

**НАЙЗ НӨХӨД:** Тантай зэргэлдээ, ойр аж төрдөггүй найз нөхөд тань хамаарна.

**4. Та сардаа уулзах юм уу эсвэл холбоо барьдаг хэдэн найз нөхөдтэй вэ?**

| огт<br>байхгүй | ганц<br>нэгхэн | хоёр | 3 - 4 | 5 - 8 | 9 ба түүнээс<br>дээш |
|----------------|----------------|------|-------|-------|----------------------|
| 0              | 1              | 2    | 3     | 4     | 5                    |

**5. Найз нөхдөөсөө хэдтэй нь хувийн асуудлаа ярих хэмжээний дотно байдаг вэ?**

| огт<br>байхгүй | ганц<br>нэгхэн | хоёр | 3 - 4 | 5 - 8 | 9 ба түүнээс<br>дээш |
|----------------|----------------|------|-------|-------|----------------------|
| 0              | 1              | 2    | 3     | 4     | 5                    |

**6.Тусламж хүсэхэд ирэх ойр дотны хэдэн найз нөхөд байдаг вэ?**

| огт<br>байхгүй | ганц<br>нэгхэн | хоёр | 3 - 4 | 5 - 8 | 9 ба түүнээс<br>дээш |
|----------------|----------------|------|-------|-------|----------------------|
| 0              | 1              | 2    | 3     | 4     | 5                    |
